# Supplementary material for: Lateral surface passivation of CdSe nanoplatelets through crown management
Source: Royal Society of Chemistry journal article supplement (doi:10.1039/d3nr03133k), 2023-01-01
Supplement: d3nr03133k1.pdf [file d3nr03133k1.pdf]

Electronic Supplementary Material (ESI) for Nanoscale. This journal is © The Royal Society of Chemistry 2023

## Electronic Supplementary Information for

# Lateral Surface Passivation of CdSe Nanoplatelets through Crown Management

Huan Liu,<sup>a,b</sup> Peixian Chen,<sup>c</sup> Xuanyu Zhang,<sup>b</sup> Xiongbin Wang,<sup>b</sup> Tingchao He,<sup>\*c</sup> and Rui Chen<sup>\*b</sup>

<sup>a</sup> Harbin Institute of Technology, Harbin 150001, China.

<sup>b</sup> Department of Electrical and Electronic Engineering, Southern University of Science and Technology, Shenzhen 518055, China. E-mail: [chenr@sustech.edu.cn](mailto:chenr@sustech.edu.cn)

<sup>c</sup> Key Laboratory of Optoelectronic Devices and Systems of Ministry of Education and Guangdong Province, College of Physics and Optoelectronic Engineering, Shenzhen University, Shenzhen 518060, China. E-mail: [tche@szu.edu.cn](mailto:tche@szu.edu.cn)

**Table S1.** Decay channels and percentages before and after ligand exchange for C and C/CNPLs.

| Parameters<br>Samples | $\tau_1 (A_1\%)$ ns | $\tau_2 (A_2\%)$ ns | $\tau_3 (A_3\%)$ ns | $\tau_{avg}$ ns |
|-----------------------|---------------------|---------------------|---------------------|-----------------|
| C NPLs                | 0.34 (7.32%)        | 2.93 (22.80%)       | 15.14 (69.88%)      | 2.95            |
| C/C NPLs              | 0.73 (9.83%)        | 3.32 (60.54%)       | 12.60 (29.64%)      | 2.94            |
| C-Br NPLs             | 0.98 (4.03%)        | 5.40 (54.18%)       | 17.70 (41.79%)      | 6.05            |
| C/C-Br NPLs           | 0.81 (4.27%)        | 4.65 (61.26%)       | 16.65 (34.47%)      | 5.01            |

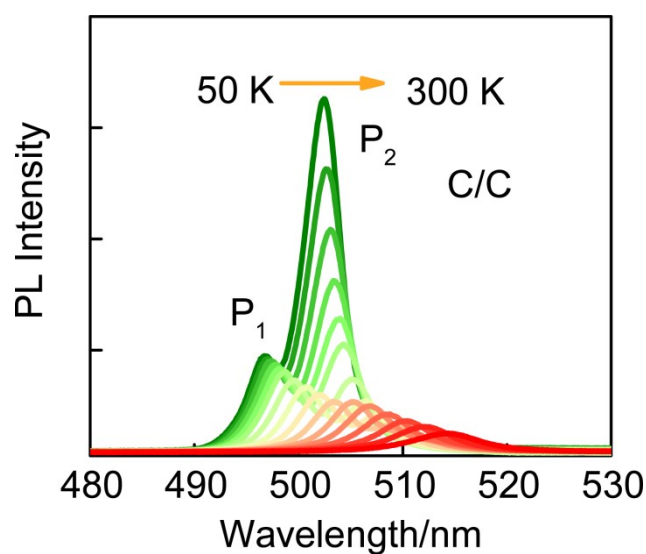

**Figure S1.** Temperature-dependent PL spectra of C/C from 50 to 300 K.

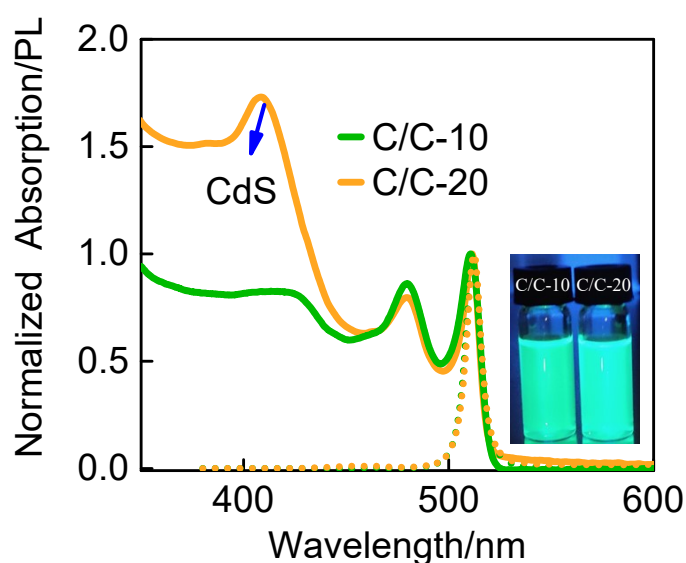

**Figure S2.** Normalized UV-visible absorption and PL spectra of C/C-10 and C/C-20 NPLs. Inset is the image of samples under UV light illumination.

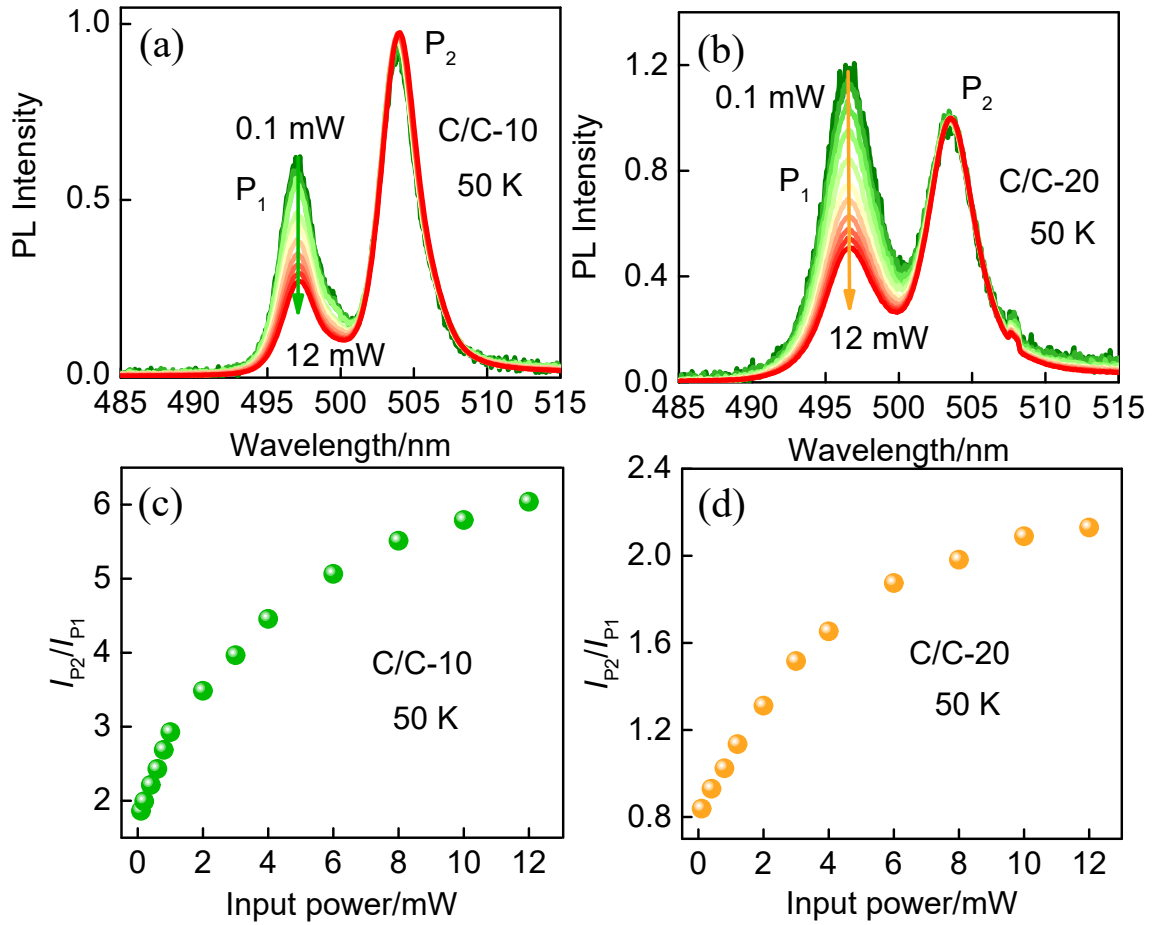

**Figure S3.** Power-dependent PL spectra of (a) C/C-10 and (b) C/C-20 NPLs at 50 K. (c) C/C-10 and (d) C/C-20 NPLs Power-dependent ratio of  $P_2/P_1$ .

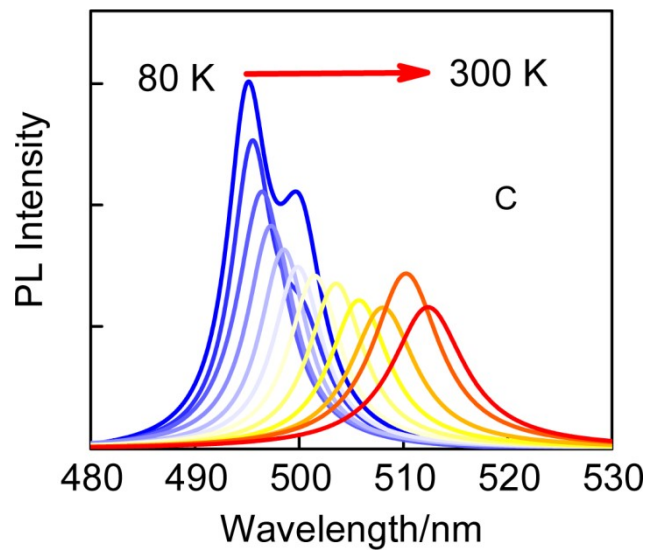

**Figure S4.** Temperature-dependent PL spectra of C NPLs under Xenon lamp excitation.

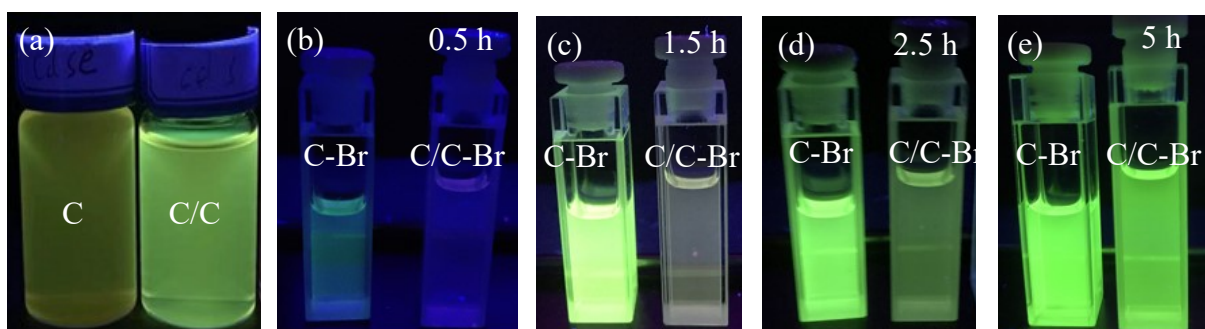

**Figure S5.** Colloidal solutions of C and C/C NPLs before ligand exchange under UV light illumination. 0 h (a), 0.5 h (b), 1.5 h (c), 2.5 h (d), and 5 h (e).

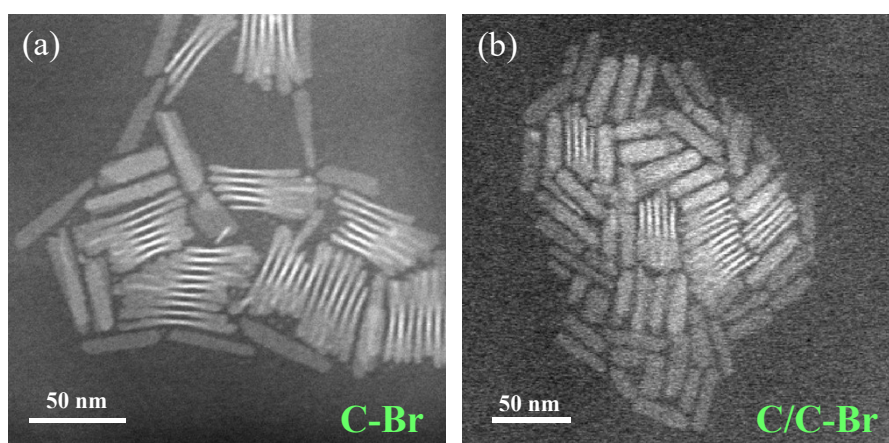

**Figure S6.** STEM images of C-Br (a) and C/C-Br NPLs (b).

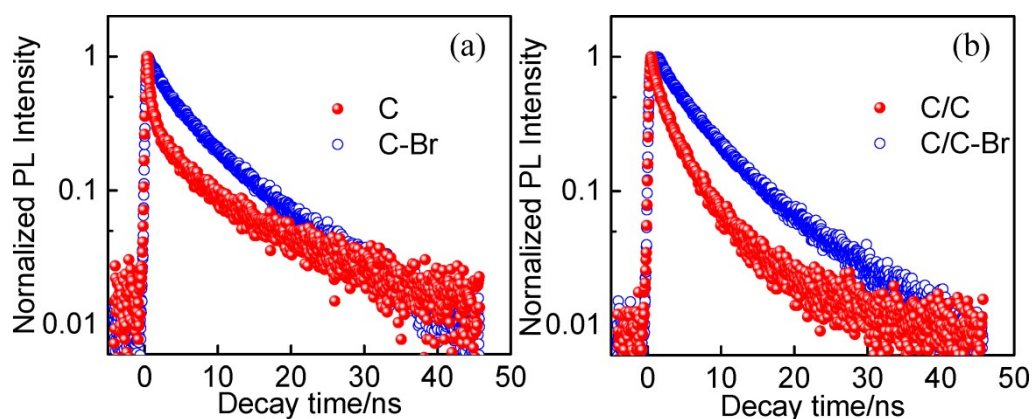

**Figure S7.** Comparison of TRPL of C (a) and C/C (b) NPLs before and after ligand exchange.
